# Supplementary material for: IL12 integrated into the CAR exodomain converts CD8+ T cells to poly-functional NK-like cells with superior killing of antigen-loss tumors
Source: PubMed Central journal article supplement — Mol Ther. 2021 Oct 19;30(2):593–605. doi: 10.1016/j.ymthe.2021.10.011 (PMC8821972; doi:10.1016/j.ymthe.2021.10.011), 2021-10-19
Supplement: mmc1.pdf [file mmc1.pdf]

YMTHE, Volume 30

## **Supplemental Information**

**IL12 integrated into the CAR exodomain converts**

**CD8<sup>+</sup> T cells to poly-functional NK-like cells**

**with superior killing of antigen-loss tumors**

**Andreas Hombach, Markus Barden, Lisa Hannappel, Markus Chmielewski, Gunter Rappl, Agapios Sachinidis, and Hinrich Abken**

Supplementary Figures

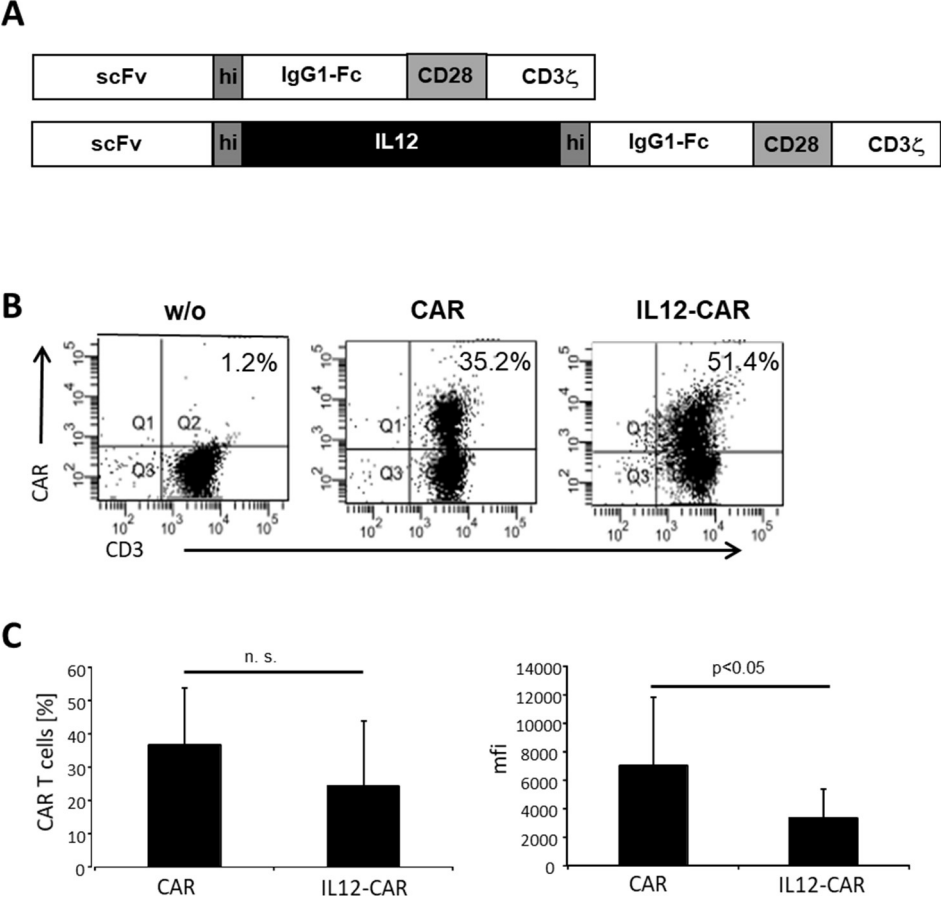

**Figure S1**

The IL12-CAR was expressed on the surface of peripheral blood T cells.

(A) Peripheral blood lymphocytes from healthy donors were retrovirally transduced for expression of the anti-CEA IL12-CAR or the homologous CAR without IL12. The CAR was detected by the anti-IgG antibody that binds to the extracellular spacer. A representative dot blot is shown.

(B) CAR expression by T cells. Figures represent mean values of the number of CAR T cells and mean fluorescence intensity (mfi) of the CAR in arbitrary units. The same numbers of T cells express the IL12-CAR, however, at lower levels per cell compared with the CAR without IL12. Data represent mean values of 10 healthy donors  $\pm$  SD. Statistical analysis was performed by the Student’s T test; n.s., not significant.

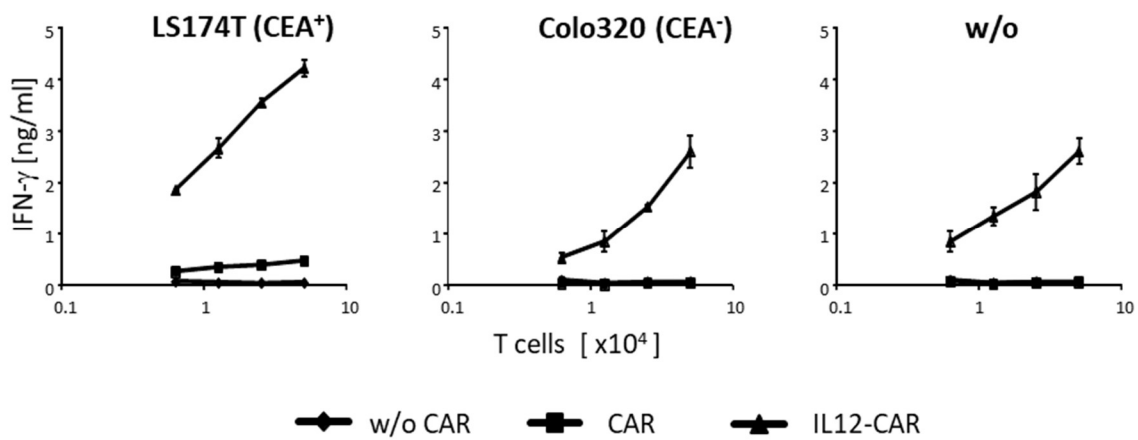

**Figure S2**

IL12-CAR induced IFN- $\gamma$  secretion independently of CAR engagement of target.

T cells with and without engineered CAR (each  $0.625\text{-}5 \times 10^4$  cells/well) were co-cultivated for 48 h in 96 micro-test plates with CEA<sup>+</sup> LS174T or CEA<sup>-</sup> Colo320 tumor cells (each  $2.5 \times 10^4$  cells/well) and without tumor cells (w/o), respectively. Supernatants were tested for IFN- $\gamma$  by ELISA. Numbers represent mean values of technical triplicates  $\pm$  SD. Data of a representative experiment out of 3 are shown.

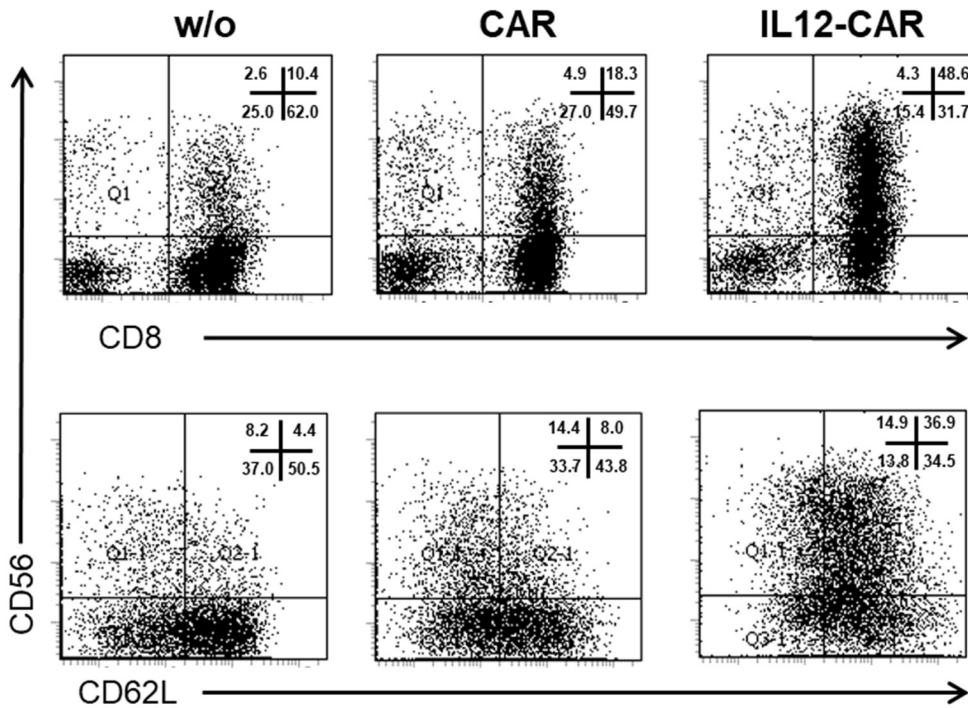

**Figure S3**

IL12-CAR T cells acquired a CD8<sup>+</sup>CD56<sup>+</sup>CD62L<sup>high</sup> phenotype.

Peripheral blood lymphocytes were engineered to express the conventional CAR or the IL12-CAR, both of same specificity for CEA, and tested 4-6 days after transduction for CD8<sup>+</sup>CD56<sup>+</sup>CD62L<sup>high</sup> T cells by flow cytometry. Non-transduced T cells (w/o CAR) served as control. Dot blots of a representative blood donor are shown.

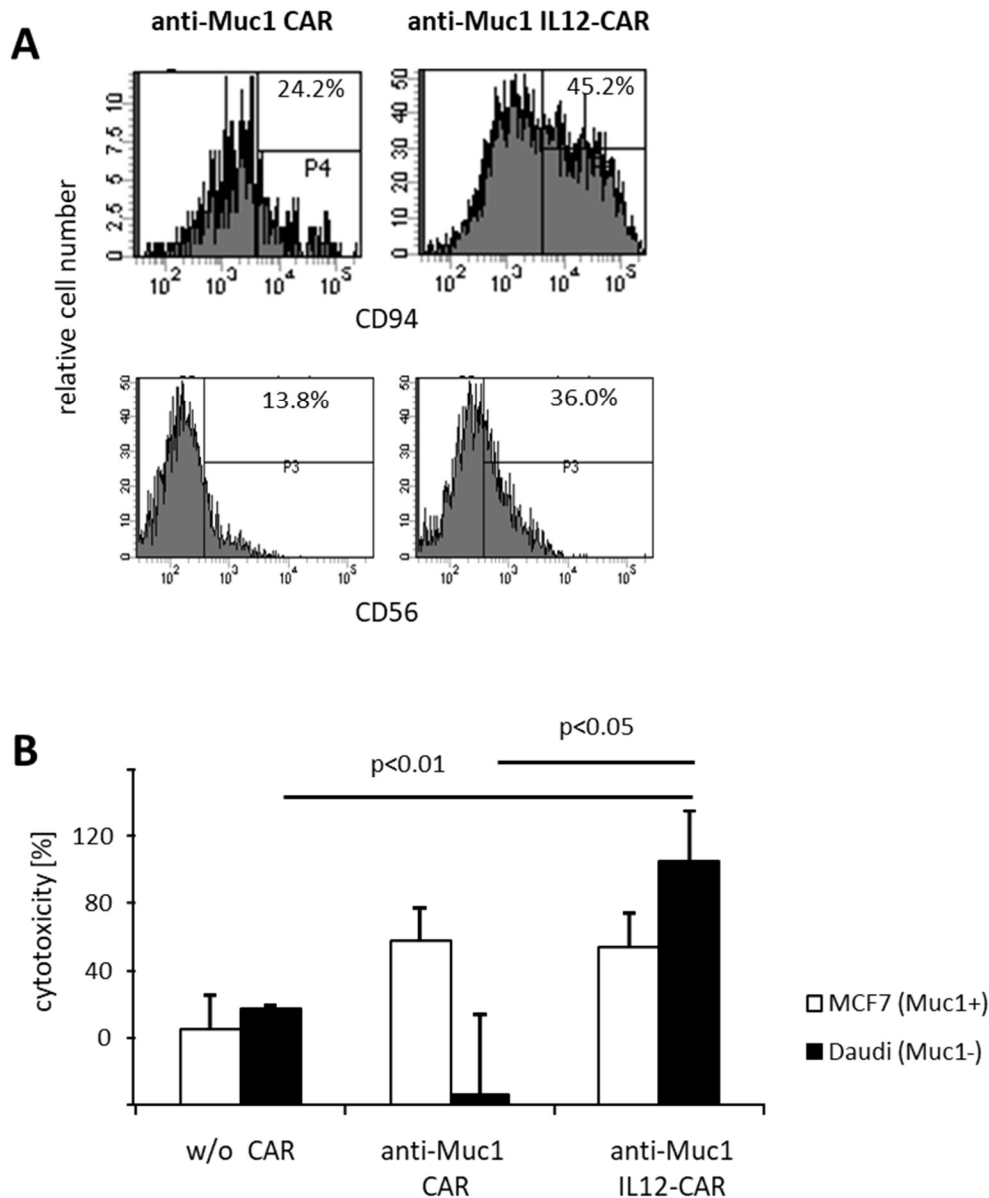

**Figure S4**

Acquisition of a CD94<sup>+</sup>CD56<sup>+</sup> phenotype and antigen-independent NK-like cytotoxicity by IL12-CAR T cells with specificity for Muc-1.

(A) T cells were engineered with a conventional CAR or IL12-CAR, each with specificity for Muc-1. CAR T cells were detected by the anti-IgG1 antibody that binds to the common extracellular spacer, gated and analyzed by flow cytometry 4 and 7 days post-transduction for CD94 and CD56 expression, respectively. Histograms of a typical experiment are shown.

(B) T cells with Muc1 specific conventional CAR or IL12-CAR were co-cultivated ( $2 \times 10^4$  T cells/well) for 48 h with Muc1<sup>+</sup> MCF7 or Muc1<sup>-</sup> Daudi tumor cells ( $2 \times 10^4$  T cells/well). Viability

of target cells was determined by the XTT assay and specific cytotoxicity was calculated. Numbers represent mean values of technical replicates  $\pm$  SD. Representative results of two independent experiments are shown. Statistical differences were determined by Student's T test.
